# Supplementary material
Source: PubMed Central journal article supplement (PMC5663501)
Supplement: NIHMS896060-supplement-supp_info.pdf [file NIHMS896060-supplement-supp_info.pdf]

# Supplementary Information: Probing bacterial cell biology using image cytometry

Julie A. Cass<sup>a</sup>, Stella Stylianidou<sup>a</sup>, Nathan J. Kuwada<sup>b</sup>, Beth Traxler<sup>c</sup>, and Paul A. Wiggins<sup>a,c,d,1</sup>

<sup>a</sup>Departments of Physics; <sup>c</sup>Microbiology and ; <sup>d</sup>Bioengineering, University of Washington, Seattle, WA, 98195; <sup>b</sup>Department of Physics, Central Washington University, Ellensburg, WA, 98926

## Software Availability and Documentation

The website for the SuperSegger software (Stylianidou et al., 2016), which contains the analysis tool `gateTool`, can be found at <http://mtshasta.phys.washington.edu/website/SuperSegger.php>. The software can be downloaded at the GitHub repository <https://github.com/wiggins-lab/SuperSegger/>. The GitHub wiki (found by following the 'Wiki' tab of the Github page) contains a detailed outline of how to use the SuperSegger software; this includes instructions for downloading, and details for both GUI and command-line use of the segmentation (`SuperSegger`) and `gateTool` analysis tool. Tutorials and sample datasets for these processes are also available at <http://mtshasta.phys.washington.edu/website/tutorials.php>.

The "View `gateTool` tutorial" link brings you to a scroll-through html version of the tutorial. The version begins with an electronic Table of Contents, so that you can jump directly to a section of interest. The "Download Tutorial" link allows you to download the tutorial script and all associated files, so that you may run through the tutorial yourself. This interactive method allows you to select your own gates by clicking to draw gates on 1D and 2D plots, just as you would when using the `gateTool` in your analysis.

| Feature                   | Description                                                                                                                                                                                                                                   |
|---------------------------|-----------------------------------------------------------------------------------------------------------------------------------------------------------------------------------------------------------------------------------------------|
| <i>SuperSegger</i>        | Automated MATLAB-based trainable image cell segmentation, fluorescence quantification and analysis suite, well suited for high-throughput time lapse fluorescence microscopy of <i>in vivo</i> bacterial cells                                |
| <code>gateTool</code>     | MATLAB-based image cytometry tool, designed to be part of the same complete package as <i>SuperSegger</i> , but able to be used independently; intakes <i>Clists</i> for plotting, gate-setting through interactive plots, and other analysis |
| <i>Clist</i>              | Matrix-structured summary of single-valued cell descriptors for all cells                                                                                                                                                                     |
| <i>3D Clist</i>           | 3D matrix-structured summary of cell descriptors for all cells, throughout the cell-cycle                                                                                                                                                     |
| <i>Single Cell Towers</i> | Time-lapse images of a single cell, stacked in chronological order, with consistent pole orientation                                                                                                                                          |
| <i>Consensus Images</i>   | Mean cell-cycle dependent fluorescence localization pattern from sets of single cell towers, spatially scaled to the same cell length and width                                                                                               |

Table 1. Summary of *SuperSegger* and its analysis features.

## *Clist* structure

All *Clist* information is collected in a single structure-array; it possesses structure-array fields for holding single-valued and time-dependent *Clist* data, cell descriptor definitions, and gates. These fields are defined as follows:

- **data**: stores single-valued measurements for all cells; each row represents an individual cell tracked through the time-course and the columns represent a subset of the > 70 cell descriptors.
- **def**: defines the `data` column number where each cell descriptors is stored.
- **data3D**: stores the time-dependent *3D Clist* data; it contains measurements for a subset of cell descriptors at each frame. The matrix contains Not-a-Number (NaNs) in frames where the cell does not exist.
- **def3D**: defines the `data3D` column number where each time-dependent cell descriptor is stored.
- **gate**: holds information about which cell descriptors have been gated (stored as field `x`) and what the gate values are (stores as field `ind`).

## *Clist* definition fields

As shown in Section II, the `def` and `def3D` fields hold definitions of the cell descriptors stored in `data` and `data3D`, respectively. (For all fluorescent focus cell descriptors, FocusX(Y) refers to focus number Y found in channel X, and FluorZ refers to fluorescence channel Z.) Below are the `def` field definitions for the *Clist*:

|                                |                                         |                                        |
|--------------------------------|-----------------------------------------|----------------------------------------|
| 1. Cell ID                     | 37. Focus1(3) intensity birth           | 73. Focus1(1) score death              |
| 2. Region num birth            | 38. Focus1(4) long axis birth           | 74. Focus1(1) intensity death          |
| 3. Region num death            | 39. Focus1(4) short axis birth          | 75. Focus1(2) long axis death          |
| 4. Cell birth time             | 40. Focus1(4) score birth               | 76. Focus1(2) short axis death         |
| 5. Cell death time             | 41. Focus1(4) intensity birth           | 77. Focus1(2) score death              |
| 6. Cell age                    | 42. Focus1(5) long axis birth           | 78. Focus1(2) intensity death          |
| 7. Old pole age                | 43. Focus1(5) short axis birth          | 79. Focus1(2) long axis death          |
| 8. Error frame                 | 44. Focus1(5) score birth               | 80. Focus1(3) short axis death         |
| 9. stat0                       | 45. Focus1(5) intensity birth           | 81. Focus1(3) score death              |
| 10. Long axis (L) birth        | 46. Focus1(1) long axis pole align      | 82. Focus1(3) intensity death          |
| 11. Long axis (L) death        | 47. Focus1(1) long axis norm pole align | 83. Focus1(4) long axis death          |
| 12. Short axis birth           | 48. Focus1(1) long axis normalized      | 84. Focus1(4) short axis death         |
| 13. Short axis death           | 49. Focus1(2) long axis normalized      | 85. Focus1(4) score death              |
| 14. Area birth                 | 50. Focus1(3) long axis normalized      | 86. Focus1(4) intensity death          |
| 15. Area death                 | 51. Focus1(4) long axis normalized      | 87. Focus1(5) long axis death          |
| 16. Region score birth         | 52. Focus1(5) long axis normalized      | 88. Focus1(5) short axis death         |
| 17. Region score death         | 53. Focus1(1) short axis normalized     | 89. Focus1(5) score death              |
| 18. X position birth           | 54. Focus1(2) short axis normalized     | 90. Focus1(5) intensity death          |
| 19. Y position birth           | 55. Focus1(3) short axis normalized     | 91. Focus1(1) gaussian fit width death |
| 20. Fluor1 sum                 | 56. Focus1(4) short axis normalized     | 92. Focus1(2) gaussian fit width death |
| 21. Fluor1 mean                | 57. Focus1(5) short axis normalized     | 93. Focus1(3) gaussian fit width death |
| 22. Fluor2 sum                 | 58. Focus1(1) gaussian fit width        | 94. Long axis/Short axis birth         |
| 23. Fluor2 mean                | 59. Focus1(2) gaussian fit width        | 95. Long axis/Short axis death         |
| 24. Num of neighbors           | 60. Focus1(3) gaussian fit width        | 96. Neck width                         |
| 25. Region gray value          | 61. Mother ID                           | 97. Maximum width                      |
| 26. Focus1(1) long axis birth  | 62. Daughter1 ID                        | 98. Cell dist to edge                  |
| 27. Focus1(1) short axis birth | 63. Daughter2 ID                        | 99. Growth Rate                        |
| 28. Focus1(1) score birth      | 64. dL max                              |                                        |
| 29. Focus1(1) intensity birth  | 65. dL min                              |                                        |
| 30. Focus1(2) long axis birth  | 66. L death / L birth                   |                                        |
| 31. Focus1(2) short axis birth | 67. Fluor1 sum death                    |                                        |
| 32. Focus1(2) score birth      | 68. Fluor1 mean death                   |                                        |
| 33. Focus1(2) intensity birth  | 69. Fluor2 sum death                    |                                        |
| 34. Focus1(2) long axis birth  | 70. Fluor2 mean death                   |                                        |
| 35. Focus1(3) short axis birth | 71. Focus1(1) long axis death           |                                        |
| 36. Focus1(3) score birth      | 72. Focus1(1) short axis death          |                                        |

Below are the def3D field definitions for the 3D Clist:

- |                        |                                         |
|------------------------|-----------------------------------------|
| 1. Cell ID             | 10. Focus1(1) short axis                |
| 2. Long axis (L)       | 11. Focus1(1) score                     |
| 3. Short axis          | 12. Focus1(1) intensity                 |
| 4. Area                | 13. Focus1(2) long axis                 |
| 5. Fluor1 sum          | 14. Focus1(2) short axis                |
| 6. Fluor1 mean         | 15. Focus1(2) score                     |
| 7. Fluor2 sum          | 16. Focus1(2) intensity                 |
| 8. Fluor2 mean         | 17. Focus1(1) long axis pole align      |
| 9. Focus1(1) long axis | 18. Focus1(1) long axis norm pole align |

The cell descriptors included in both the *Clist* and *3D Clist* are easily customizable. Users may do this by editing the *SuperSegger* script `trackOptiClist.m`, or simply by using the `add` and `add3d` commands of the `gateTool` (See Table 2).

### gateTool Implementation

The `gateTool` function allows the user to manage all *Clist* modification and visualization by passing commands through a single `gateTool` function. Table 2 gives a description of all `gateTool` commands for modifying the *Clist*; this includes options such as merging *Clists*, loading data from the *Clist*, and setting gates. Table 3 gives a description of all `gateTool` commands for viewing the *Clist* data; this includes options such as producing histograms, dot plots, KDE plots, and setting axis scaling. Finally, Table 4 gives a description of all additional `gateTool` commands for such options as saving the *Clist* and displaying the *Clist* channel definitions. To use these commands, the user simply passes in the *Clist* (or a set of *Clists*), along with the command and any accompanying arguments (i.e. `[output] = gateTool(Clist, 'command', argument);`). Several commands can (and some commands *must*) be used together in a single call to `gateTool`. A tutorial for using the `gateTool` can be found at <http://mtshasta.phys.washington.edu/website/gatetoolTutorial/sample.html>.

If you prefer to use a GUI's, you can open an easy-to-use `gateTool` GUI using the script `gateToolGUI`. An image of this GUI is shown in Figure 1.

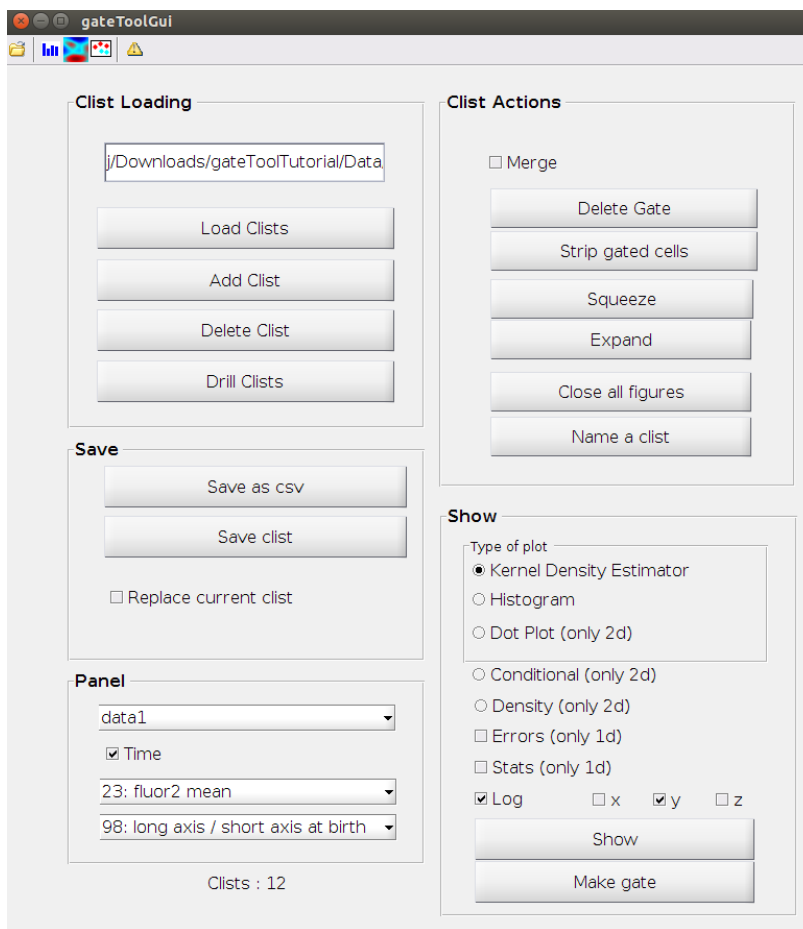

Fig. 1. Image of the gateTool GUI.

| Command   | Argument(s) | Description                                                                                                            |
|-----------|-------------|------------------------------------------------------------------------------------------------------------------------|
| 'merge'   |             | Merge and output all input <i>Clists</i> into a single <i>Clist</i>                                                    |
| 'strip'   |             | Remove all un-gated cells from the <i>Clist</i> data                                                                   |
| 'squeeze' |             | Treat all <i>Clist</i> entries identically                                                                             |
| 'expand'  |             | Treat all <i>Clist</i> entries as different conditions                                                                 |
| 'name'    | name        | Provide a label for a <i>Clist</i> (appears in plot legends)                                                           |
| 'color'   | cc          | Provide a color for a <i>Clist</i> (used for plotting <i>Clist</i> data)                                               |
| 'add'     | data, name  | Add a field ( <i>name</i> ) to the <i>Clist</i> data, using input values ( <i>data</i> )                               |
| 'add3d'   | data, name  | Add a field ( <i>name</i> ) to the 3D <i>Clist</i> data, using input values ( <i>data</i> )                            |
| 'get'     | ind         | Output data from data column <i>ind</i>                                                                                |
| 'make'    | ind         | Gate all input <i>Clists</i> on index (indices) in <i>ind</i> . ( <i>ind</i> is a vector with either 1 or 2 elements.) |
| 'getgate' | ind         | Outputs the indexed gate                                                                                               |

Table 2. *Clist* modification commands.

| Command    | Argument(s) | Description                                                                                                                                                                                                 |
|------------|-------------|-------------------------------------------------------------------------------------------------------------------------------------------------------------------------------------------------------------|
| 'show'     | ind         | Make a figure for viewing the <i>Clist</i> . ind is either an index or pair of indices specifying what is to be visualized. If no ind is passed then all gates are displayed on a single <i>Clist</i> input |
| 'time'     | ind         | Make a temporal plot of single cell dynamics for one index.                                                                                                                                                 |
| 'hist'     | ind         | Make a 1 or 2D histogram (depending on dimension of ind).                                                                                                                                                   |
| 'dot'      | ind         | Make a 2D dot plot (dim. of ind must be 2).                                                                                                                                                                 |
| 'kde'      | ind         | Make a 1 or 2D KDE (depending on dimension of ind).                                                                                                                                                         |
| 'bin'      | bin         | Set binning for hist, kde plots. (bin: (1D) scalar is number of bins, vector is set of bin centers, (2D) vector is set of bin numbers for each dim, cell array is two vectors of bin centers)               |
| 'den'      |             | Normalize hist, kde plots to show probability density                                                                                                                                                       |
| 'cond'     |             | Normalize hist, kde plots to show conditional probability density                                                                                                                                           |
| 'rk'       | rk          | Set radius of the Gaussian kernel for kde plots                                                                                                                                                             |
| 'rm'       | rm          | Set radius of the point mask (size of plotted point) for kde plots                                                                                                                                          |
| 'mult'     | mult        | Set resolution for kde plots (i.e. set the number of pixels in the image)                                                                                                                                   |
| 'err'      |             | Show error in 1D hist, kde plots                                                                                                                                                                            |
| 'inv'      |             | Invert 2D hist, kde plots for printing                                                                                                                                                                      |
| 'stat'     |             | Show statistics for a 1D show command                                                                                                                                                                       |
| 'log'      | axes        | Set of axes to set with log scales. axes = [1,2,3] will set x, y and color axes to log scale                                                                                                                |
| 'no clear' |             | Do not run clear figure (clf) before drawing                                                                                                                                                                |
| 'new fig'  |             | Draws new figures for each input <i>Clist</i>                                                                                                                                                               |

**Table 3. *Clist* visualization commands. Note: these commands do not modify the *Clist*. All commands in this table must be used in conjunction with the 'show' command. All commands specifying aspects of 'kde' and 'hist' plots must be used in conjunction with the 'kde' and 'hist' commands.**

| Command | Argument(s) | Description                                                               |
|---------|-------------|---------------------------------------------------------------------------|
| 'def'   |             | Show all <i>Clist</i> channel definitions at the command line             |
| 'def3D' |             | Show all 3D <i>Clist</i> channel definitions at the command line          |
| 'xls'   | filename    | Export an excel document with <i>Clist</i> data (Excel must be installed) |
| 'csv'   | filename    | Export a csv document with <i>Clist</i> data                              |
| 'save'  | filename    | Save <i>Clist</i> to a .mat file                                          |
| 'units' | units       | Set a multiplier for the data to set desired units                        |
| 'drill' |             | Use recursive loading through a directory tree to any level               |

**Table 4. Additional commands.**

## Strains and data collection

The analysis for this work was applied to data taken from a variety of new and previous studies. A list of all strains used is provided in Table 5. Data for the "Length as a proxy for cell age" and "Overexpression phenotypes" experiments were initially collected for previous studies (respectively, (Cass et al., 2016) and (Kuwada et al., 2015a; Kuwada et al., 2015b)). For all experiments, slides were prepared using pads of 0.2% LM- agarose (Cat. no. 16520-020). Cells are spotted onto the pads, covered with a coverslip and sealed using VaLP (1:1:1 vaseline, lanolin and paraffin). Imaging was completed using a Nikon Ti-E inverted wide-field fluorescence microscope with a large format sCMOS camera (Andor NEO) and controlled by NIS-Elements. Samples were kept at 30°C throughout the imaging process using an environmental chamber. Image processing and analysis was completed using custom MATLAB (Natick, MA) software

| Bacterium        | Strain | Vector    | Experiment                |
|------------------|--------|-----------|---------------------------|
| <i>A. baylyi</i> | ADP1   |           | Morphology gating         |
| <i>E. coli</i>   | AB1157 | pZA12-GFP | Morphology gating         |
| <i>E. coli</i>   | MG1655 | pALA2705  | Length as age proxy       |
| <i>E. coli</i>   | K-12   | ASKA      | Overexpression phenotypes |
| <i>E. coli</i>   | MG1655 |           | Cell-cycle duration       |

**Table 5. Strains.**

## Kernel Density Estimates (KDEs)

Kernel density estimates provide a binning-independent, smoothed representation, or estimate, of the probability density of data. The histogram of values is normalized to provide the probability density, and the resulting values are convolved with a Gaussian kernel, smoothing the resulting values to prevent artifacts from binning. Two example 2D KDE plots are provided in Fig. 3.

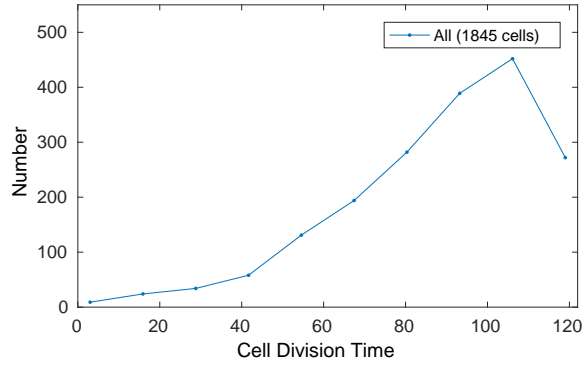

**Fig. 2.** Histogram of division times for cells in "Length as a proxy for cell age" experiment.

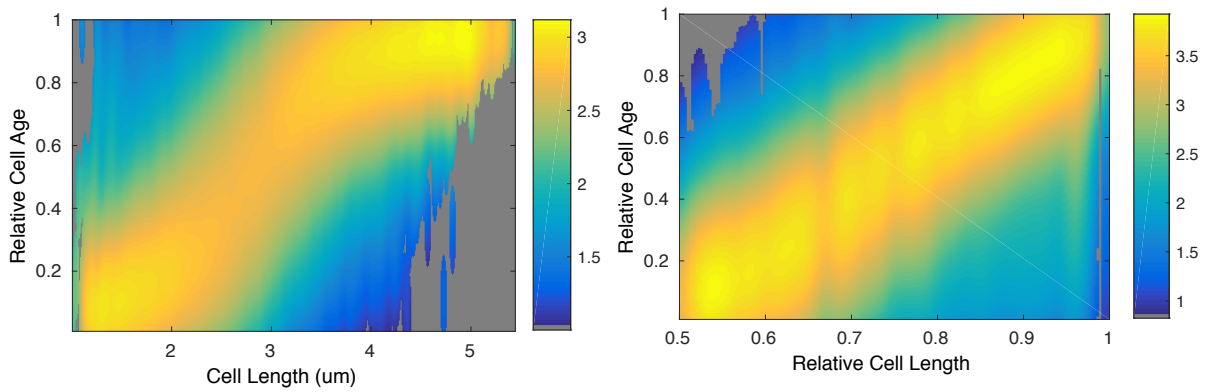

**Fig. 3. Conditional Probabilities for Relative Variables.** For the "Length as a proxy for cell age" experiment, we provide the conditional probabilities for cell length vs relative cell age (left) and for relative cell length vs relative cell age (right). Here "relative" means relative to the end-of-cell-cycle value (i.e. length and age at the time of cell division).

## Computation of p-values for the determinants of growth rate

To compute the p-values for the different determinants of growth rate, we used the non-parameter Kolmogorov–Smirnov Test to compare the distributions and test whether they were generated from the same PDF. We used the MATLAB implementation `kstest2`. Due to the small number of determinants tested, we did not apply a Bonferroni correction to correct for multiplicity.

## Estimation of mutual information

The mutual information is defined:

$$M(X, Y) \equiv \mathbb{E}_{X, Y} \log \frac{p(X, Y)}{p(X) p(Y)}, \quad [1]$$

where  $p$  are the pdf and joint pdf distributions for random variables  $X$  and  $Y$ . To estimate the probability distributions, we define the empirical probability distribution using a Kernel Density Estimate:

$$\hat{p}(x|x^N; \sigma) \equiv N^{-1} \sum_{i=1}^N K(x|x_i, \sigma), \quad [2]$$

where  $K$  is a Gaussian kernel centered on training observation  $x_i$  and  $\sigma$  is the kernel width. The leave-one-out-cross-validated mutual information estimate is:

$$\hat{M}(x^N, y^N; \sigma) \equiv N^{-1} \sum_{i=1}^N \log \frac{\hat{p}(x_i, y_i | x^{\neq i}, y^{\neq i})}{\hat{p}(x_i | x^{\neq i}) \hat{p}(y_i | y^{\neq i})}, \quad [3]$$

where  $x^{\neq i}$  and  $y^{\neq i}$  refer to the data set without the  $i$ th observation. Finally we maximize  $M$  with respect to the kernel density widths with respect to  $X$  and  $Y$ .

| Descriptor           | P-value |
|----------------------|---------|
| Phase Brightness     | 0.901   |
| Dist. to Colony Edge | 0.857   |
| Number of Old Poles  | 0.012   |
| Cell Length at Birth | 0.026   |

**Table 6. P-values for growth rate distributions gated by cell descriptor P-values are calculated for the growth distributions in Fig. 4E. For each cell descriptor, the growth rate distributions for the highest (+) and lowest (-) subpopulations are compared.**

## References

- Cass, J. A., Kuwada, N. J., Traxler, B., and Wiggins, P. A. (2016). Escherichia coli chromosomal loci segregate from midcell with universal dynamics. *Biophysical Journal* **110**: 2597–2609.
- Kuwada, N. J., Traxler, B., and Wiggins, P. A. (2015a). Genome-scale quantitative characterization of bacterial protein localization dynamics throughout the cell cycle. *Mol Microbiol* **95**: 64–79.
- Kuwada, N. J., Traxler, B., and Wiggins, P. A. (2015b). High-throughput cell-cycle imaging opens new doors for discovery. *Curr Genet* **61**: 513–6.
- Stylianidou, S., Brennan, C., Nissen, S. B., Kuwada, N. J., and Wiggins, P. A. (2016). Supersegger: robust image segmentation, analysis and lineage tracking of bacterial cells. *Mol Microbiol* **102**.
